# Supplementary material for: Morphological, dynamic mechanical, rheological and impact strength properties of the PP/PVB blends: the effect of waste PVB as a toughener
Source: Royal Society of Chemistry journal article supplement (doi:10.1039/c6ra04143d), 2016-01-01
Supplement: c6ra04143d1.pdf [file c6ra04143d1.pdf]

## Supplementary information

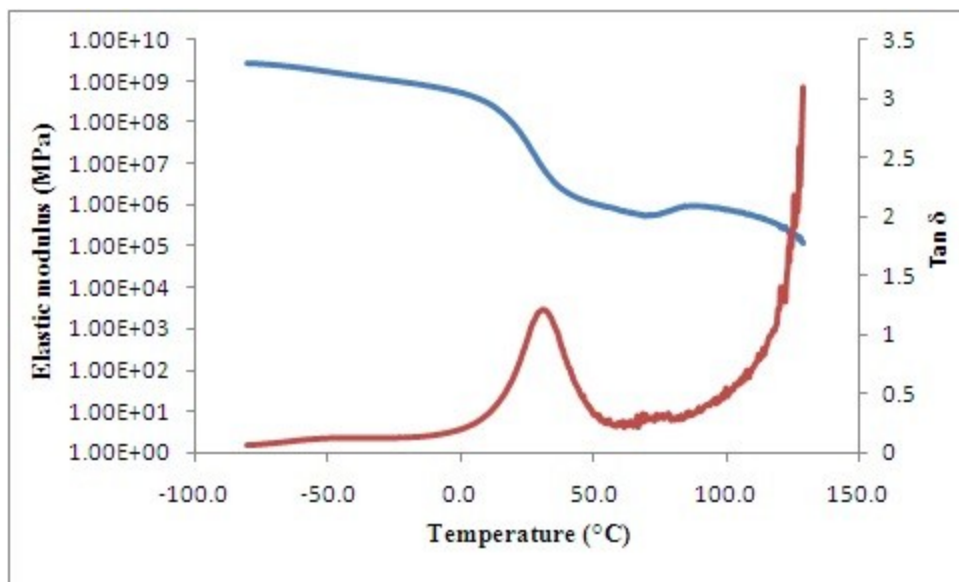

Fig. S1. Temperature dependence of the storage modulus and  $\tan \delta$  for PVB.

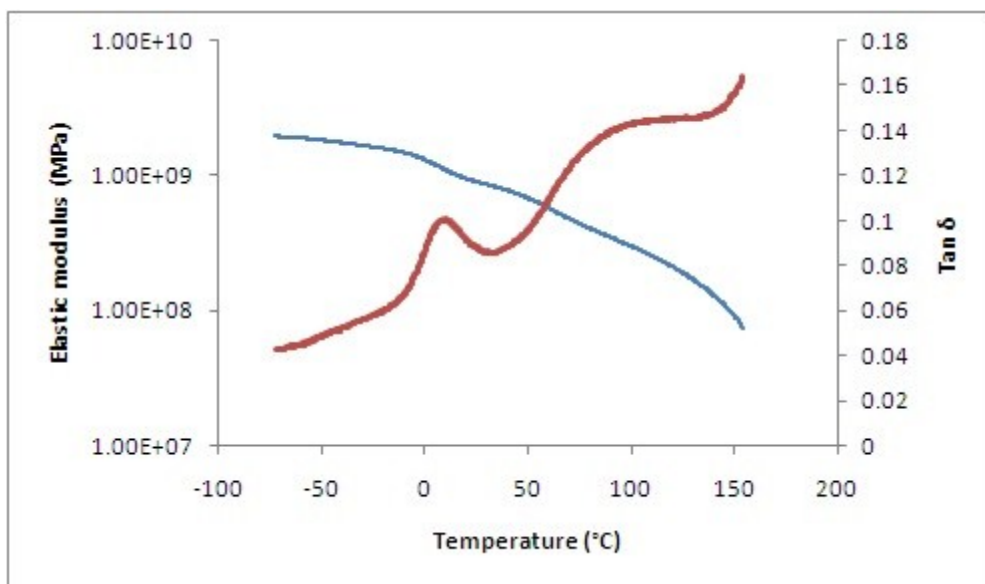

Fig. S2. Temperature dependence of the storage modulus and  $\tan \delta$  for PP.
